# Supplementary material for: Cytotoxicity and Proapoptotic Effects of Allium atroviolaceum Flower Extract by Modulating Cell Cycle Arrest and Caspase‐Dependent and p53‐Independent Pathway in Breast Cancer Cell Lines
Source: Hindawi journal article supplement (doi:10.1155/2017/1468957), 2017-01-01
Supplement: f1 [file 1468957.f1.pdf]

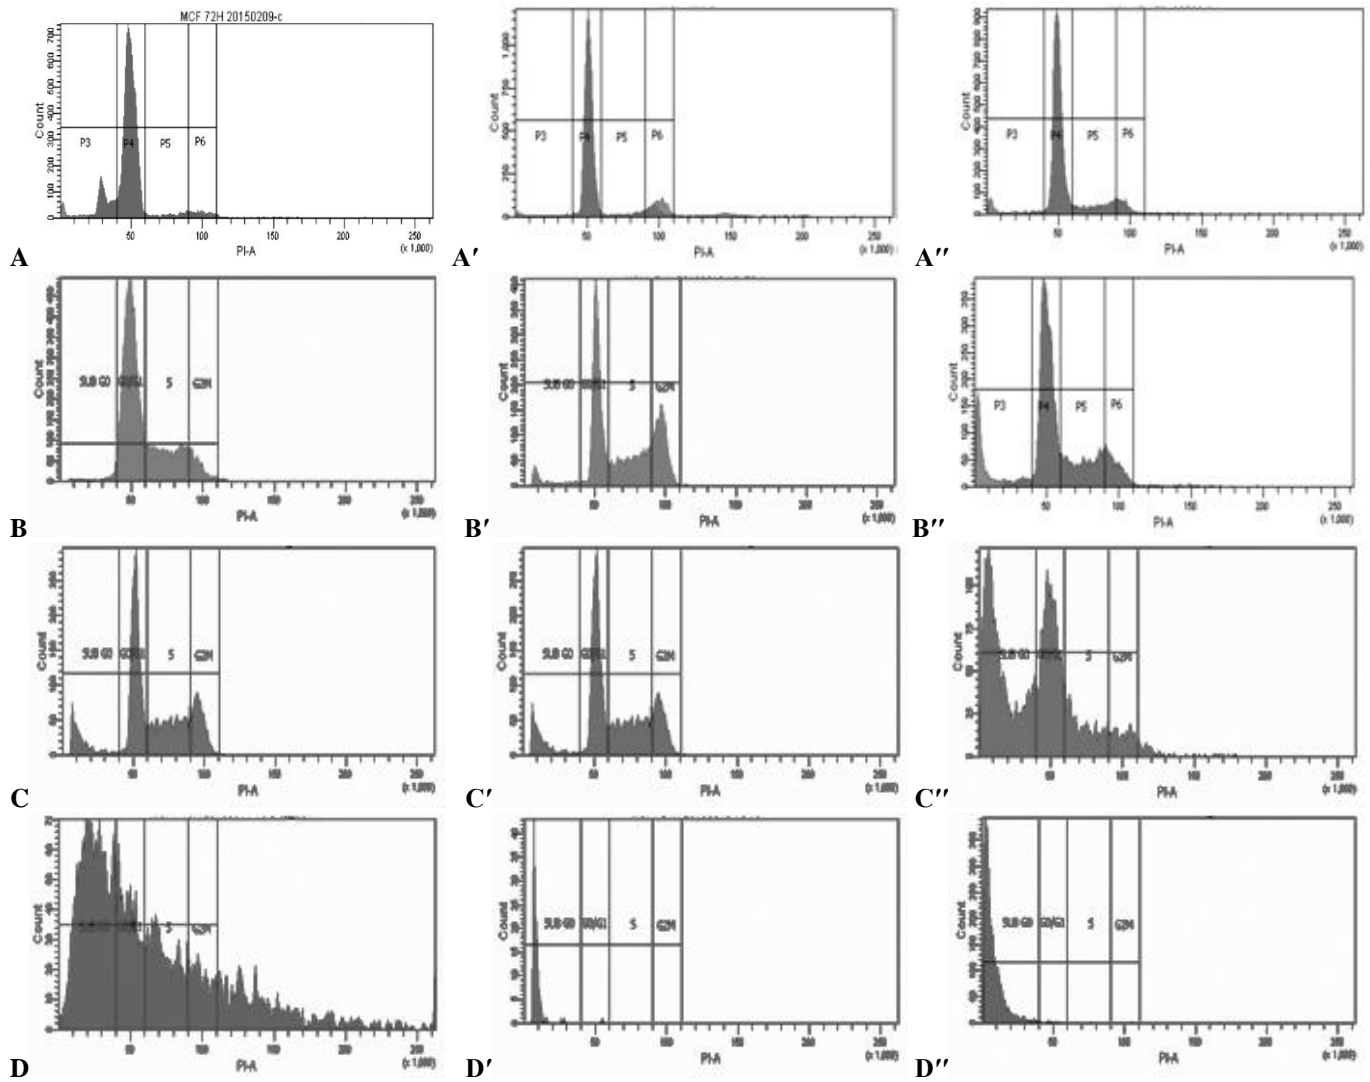

**I.** Representative DNA frequency histograms of MCF7 without treatment (A), treatment with IC<sub>25</sub> of FAA (B), IC<sub>50</sub> of FAA (C), IC<sub>75</sub> of FAA (D) for 24 h; without treatment (A'), treatment with IC<sub>25</sub> of FAA (B'), IC<sub>50</sub> of FAA (C'), IC<sub>75</sub> of FAA (D') after 48h and without treatment (A''), treatment with IC<sub>25</sub> of FAA (B''), IC<sub>50</sub> of FAA (C''), IC<sub>75</sub> of FAA (D'') after 72 h, analyzed by flow cytometer.

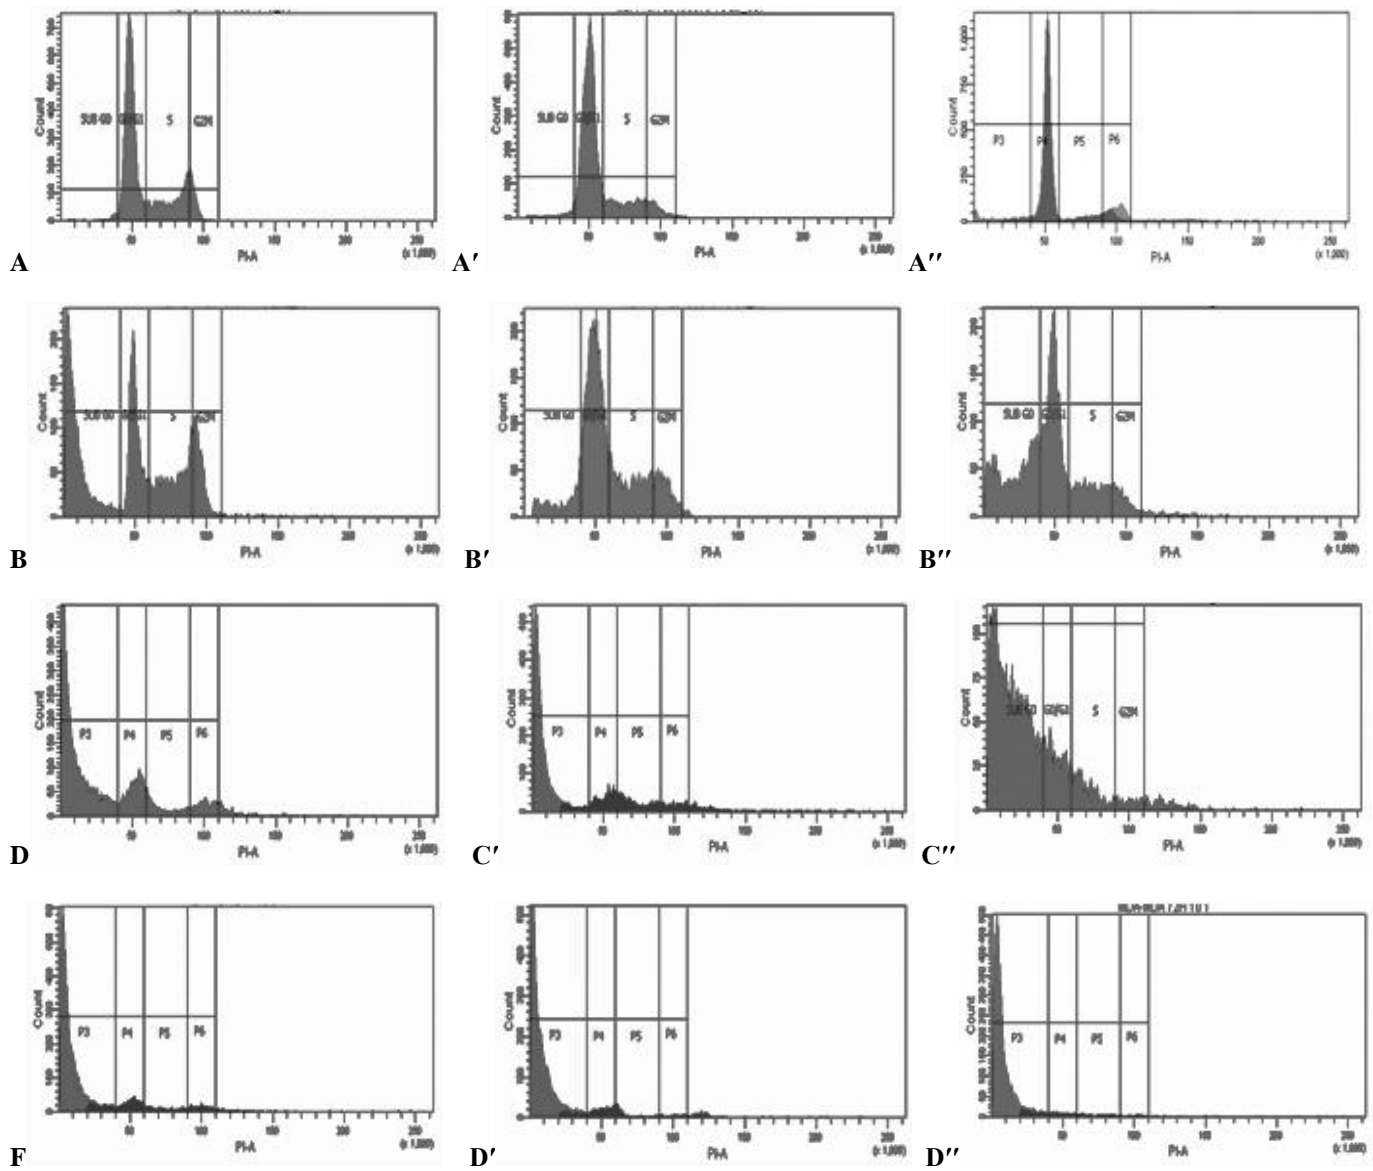

**II. Representative DNA frequency histograms of MDA-MB-231 without treatment (A), treatment with IC<sub>25</sub> of FAA (B), IC<sub>50</sub> of FAA (C) , IC<sub>75</sub> of FAA (D) for 24 h, without treatment (A'), treatment with IC<sub>25</sub> of FAA (B'), IC<sub>50</sub> of FAA (C') , IC<sub>75</sub> of FAA (D') for 48 h and without treatment (A''), treatment with IC<sub>25</sub> of FAA (B''), IC<sub>50</sub> of FAA (C'') , IC<sub>75</sub> of FAA (D'') for 72 h; analyzed by flow cytometer.**
